# Supplementary material for: Escaping blood-fed malaria mosquitoes minimize tactile detection without compromising on take-off speed
Source: Oxford University Press journal article supplement (doi:10.1242/jeb.163402), 2017-10-15
Supplement: jeb163402supp.pdf [file jeb163402supp.pdf]

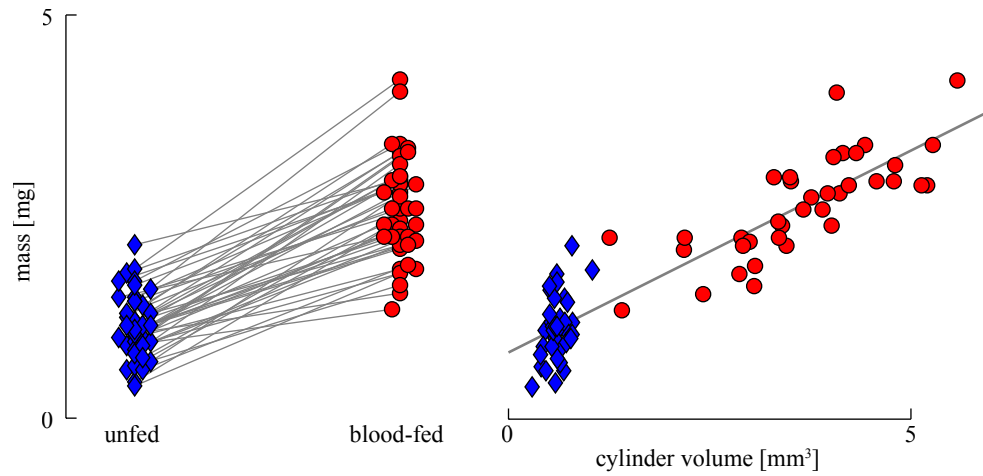

**Fig. S1.** Body mass was estimated based on the size of the mosquito, expressed by the cylindrical volume metric (Eqn. 1). (A) mass of all 44 measured mosquitoes before and after blood feeding. (B) correlation between body mass and the cylindrical volume metric for all mosquitoes, as described by the grey trend line (Eqn. 2). In both panels, blue diamonds are for mosquitoes before blood feeding, and red circles refer to post-blood feeding.

**Table S1.** Incentive (voluntary take-off or substrate vibration stimulus) did not significantly affect kinematics or force production during the take-off.

| parameter                                                           | condition | incentive | n  | mean | standard deviation | median | Q1   | Q3   | normality p-value | incentive p-value |
|---------------------------------------------------------------------|-----------|-----------|----|------|--------------------|--------|------|------|-------------------|-------------------|
| Mass ratio (Rm) [-]                                                 | unfed     | voluntary | 15 | 1.01 | 0.05               | 1.00   | 0.97 | 1.04 | 0.908             | 0.737             |
|                                                                     |           | stimulus  | 16 | 0.99 | 0.08               | 1.01   | 0.95 | 1.01 | 0.812             |                   |
|                                                                     | blood-fed | voluntary | 17 | 1.92 | 0.35               | 1.85   | 1.78 | 1.97 | <0.001            | 0.406             |
|                                                                     |           | stimulus  | 15 | 1.95 | 0.28               | 1.90   | 1.79 | 2.12 | 0.868             |                   |
| Push-off time ( $\Delta t_{\text{push-off}}$ ) [ms]                 | unfed     | voluntary | 15 | 26.0 | 11.4               | 22.1   | 20.9 | 26.9 | <0.001            | 0.953             |
|                                                                     |           | stimulus  | 16 | 26.5 | 11.9               | 22.6   | 19.3 | 28.7 | 0.001             |                   |
|                                                                     | blood-fed | voluntary | 17 | 37.5 | 17.0               | 30.1   | 25.8 | 42.3 | 0.005             | 0.113             |
|                                                                     |           | stimulus  | 15 | 28.7 | 8.1                | 29.0   | 23.2 | 30.8 | 0.055             |                   |
| Lift-off displacement ( $X_{\text{lift-off}}/l_{\text{body}}$ ) [-] | unfed     | voluntary | 15 | 0.94 | 0.51               | 0.73   | 0.68 | 1.07 | <0.001            | 0.441             |
|                                                                     |           | stimulus  | 16 | 0.78 | 0.28               | 0.73   | 0.61 | 0.88 | <0.001            |                   |
|                                                                     | blood-fed | voluntary | 17 | 0.99 | 0.32               | 0.92   | 0.86 | 1.06 | 0.024             | 0.054             |
|                                                                     |           | stimulus  | 15 | 0.80 | 0.33               | 0.76   | 0.57 | 0.93 | 0.095             |                   |
| Lift-off speed ( $U_{\text{lift-off}}$ ) [ $\text{m s}^{-1}$ ]      | unfed     | voluntary | 15 | 0.26 | 0.06               | 0.25   | 0.23 | 0.30 | 0.835             | 0.464             |
|                                                                     |           | stimulus  | 16 | 0.24 | 0.04               | 0.25   | 0.20 | 0.27 | 0.766             |                   |
|                                                                     | blood-fed | voluntary | 17 | 0.21 | 0.04               | 0.22   | 0.18 | 0.23 | 0.200             | 0.122             |
|                                                                     |           | stimulus  | 15 | 0.19 | 0.06               | 0.18   | 0.15 | 0.22 | 0.371             |                   |
| Lift-off ascent angle ( $\gamma_{\text{lift-off}}$ ) [-]            | unfed     | voluntary | 15 | 48°  | 12°                | 51°    | 43°  | 58°  | 0.028             | 0.540             |
|                                                                     |           | stimulus  | 16 | 52°  | 21°                | 55°    | 32°  | 70°  | 0.552             |                   |
|                                                                     | blood-fed | voluntary | 17 | 34°  | 25°                | 40°    | 7°   | 54°  | 0.061             | 0.650             |
|                                                                     |           | stimulus  | 15 | 39°  | 23°                | 39°    | 22°  | 56°  | 0.927             |                   |
| Lift-off body pitch ( $\beta_{\text{lift-off}}$ ) [-]               | unfed     | voluntary | 15 | 13°  | 18°                | 17°    | 4°   | 29°  | 0.131             | 0.890             |
|                                                                     |           | stimulus  | 16 | 13°  | 20°                | 21°    | -4°  | 29°  | 0.315             |                   |
|                                                                     | blood-fed | voluntary | 17 | 25°  | 13°                | 29°    | 20°  | 33°  | 0.001             | 1.000             |
|                                                                     |           | stimulus  | 15 | 25°  | 15°                | 25°    | 17°  | 38°  | 0.610             |                   |
| Push-off force ( $F/mg_{\text{push-off}}$ ) [-]                     | unfed     | voluntary | 15 | 2.08 | 0.40               | 2.06   | 1.87 | 2.29 | 0.423             | 0.395             |
|                                                                     |           | stimulus  | 16 | 1.98 | 0.46               | 1.94   | 1.71 | 2.23 | 0.605             |                   |
|                                                                     | blood-fed | voluntary | 17 | 1.54 | 0.30               | 1.64   | 1.21 | 1.77 | 0.030             | 0.850             |
|                                                                     |           | stimulus  | 15 | 1.58 | 0.26               | 1.50   | 1.39 | 1.82 | 0.775             |                   |
| Maximum push-off force ( $F/mg_{\text{push-off}}$ ) [-]             | unfed     | voluntary | 15 | 2.43 | 0.43               | 2.44   | 2.18 | 2.70 | 0.919             | 0.828             |
|                                                                     |           | stimulus  | 16 | 2.48 | 0.44               | 2.41   | 2.24 | 2.61 | 0.152             |                   |
|                                                                     | blood-fed | voluntary | 17 | 2.00 | 0.45               | 2.14   | 1.62 | 2.34 | 0.169             | 0.910             |
|                                                                     |           | stimulus  | 15 | 2.03 | 0.36               | 2.06   | 1.81 | 2.24 | 0.297             |                   |
| Aerial flight speed ( $U_{\text{aerial}}$ ) [ $\text{m s}^{-1}$ ]   | unfed     | voluntary | 15 | 0.34 | 0.09               | 0.35   | 0.25 | 0.42 | 0.376             | 0.395             |
|                                                                     |           | stimulus  | 16 | 0.37 | 0.11               | 0.37   | 0.28 | 0.46 | 0.988             |                   |
|                                                                     | blood-fed | voluntary | 17 | 0.36 | 0.07               | 0.39   | 0.30 | 0.40 | 0.368             | 0.308             |
|                                                                     |           | stimulus  | 15 | 0.34 | 0.08               | 0.32   | 0.27 | 0.41 | 0.177             |                   |
| Aerial ascent angle ( $\gamma_{\text{aerial}}$ ) [-]                | unfed     | voluntary | 15 | 30°  | 16°                | 36°    | 25°  | 42°  | 0.026             | 0.093             |
|                                                                     |           | stimulus  | 16 | 21°  | 21°                | 24°    | 1°   | 33°  | 0.634             |                   |
|                                                                     | blood-fed | voluntary | 17 | 17°  | 17°                | 17°    | 6°   | 29°  | 0.971             | 0.546             |
|                                                                     |           | stimulus  | 15 | 13°  | 22°                | -2°    | -4°  | 35°  | 0.006             |                   |
| Aerial body pitch ( $\beta_{\text{aerial}}$ ) [-]                   | unfed     | voluntary | 15 | 26°  | 24°                | 39°    | 12°  | 43°  | 0.038             | 0.243             |
|                                                                     |           | stimulus  | 16 | 20°  | 20°                | 26°    | 1°   | 34°  | 0.028             |                   |
|                                                                     | blood-fed | voluntary | 17 | 31°  | 15°                | 33°    | 27°  | 42°  | 0.037             | 0.571             |
|                                                                     |           | stimulus  | 15 | 28°  | 18°                | 29°    | 13°  | 45°  | 0.341             |                   |
| Aerial force ( $F/mg_{\text{aerial}}$ ) [-]                         | unfed     | voluntary | 15 | 1.05 | 0.11               | 1.03   | 0.98 | 1.10 | 0.827             | 0.859             |
|                                                                     |           | stimulus  | 16 | 1.06 | 0.15               | 1.02   | 0.98 | 1.10 | 0.039             |                   |
|                                                                     | blood-fed | voluntary | 17 | 1.10 | 0.11               | 1.12   | 1.01 | 1.14 | 0.219             | 0.910             |
|                                                                     |           | stimulus  | 15 | 1.03 | 0.09               | 1.05   | 1.00 | 1.09 | 0.109             |                   |

**Table S2.** The effect of blood-feeding on body mass, and on the take-off dynamics and force production throughout the complete take-off.

| parameter                                                           | feeding condition | n  | mean | standard deviation | median | Q1   | Q3   | normality p-value | feeding condition p-value |
|---------------------------------------------------------------------|-------------------|----|------|--------------------|--------|------|------|-------------------|---------------------------|
| Mass ratio ( $R_m$ ) [-]                                            | unfed             | 31 | 1.00 | 0.06               | 1.01   | 0.97 | 1.04 | 0.867             | <b>0.010</b>              |
|                                                                     | blood-fed         | 32 | 1.93 | 0.32               | 1.88   | 1.80 | 2.02 | < <b>0.001</b>    |                           |
| Push-off time ( $\Delta t_{\text{push-off}}$ ) [ms]                 | unfed             | 31 | 26.3 | 11.5               | 22.6   | 19.6 | 27.4 | < <b>0.001</b>    | <b>0.002</b>              |
|                                                                     | blood-fed         | 32 | 33.4 | 14.1               | 29.3   | 25.3 | 36.4 | < <b>0.001</b>    |                           |
|                                                                     | all               | 63 | 29.9 | 13.3               | 26.0   | 21.3 | 32.2 | -                 | -                         |
| Lift-off displacement ( $X_{\text{lift-off}}/l_{\text{body}}$ ) [-] | unfed             | 31 | 0.86 | 0.41               | 0.73   | 0.65 | 0.89 | < <b>0.001</b>    | 0.159                     |
|                                                                     | blood-fed         | 32 | 0.90 | 0.33               | 0.89   | 0.69 | 0.98 | <b>0.023</b>      |                           |
|                                                                     | all               | 63 | 0.88 | 0.37               | 0.80   | 0.67 | 0.93 | -                 | -                         |
| Lift-off speed ( $U_{\text{lift-off}}$ ) [m s <sup>-1</sup> ]       | unfed             | 31 | 0.25 | 0.05               | 0.25   | 0.21 | 0.28 | 0.454             | <b>0.001</b>              |
|                                                                     | blood-fed         | 32 | 0.20 | 0.05               | 0.21   | 0.16 | 0.23 | 0.500             |                           |
|                                                                     | all               | 63 | 0.23 | 0.05               | 0.23   | 0.19 | 0.26 | -                 | -                         |
| Lift-off ascent angle ( $\gamma_{\text{lift-off}}$ ) [-]            | unfed             | 31 | 50°  | 17°                | 53°    | 35°  | 60°  | 0.493             | <b>0.016</b>              |
|                                                                     | blood-fed         | 32 | 36°  | 24°                | 39°    | 15°  | 55°  | 0.221             |                           |
| Lift-off body pitch ( $\beta_{\text{lift-off}}$ ) [-]               | unfed             | 31 | 13°  | 19°                | 19°    | -2°  | 29°  | <b>0.045</b>      | <b>0.010</b>              |
|                                                                     | blood-fed         | 32 | 25°  | 14°                | 28°    | 18°  | 34°  | <b>0.026</b>      |                           |
| Push-off force ( $F/mg_{\text{push-off}}$ ) [-]                     | unfed             | 31 | 2.03 | 0.43               | 1.97   | 1.75 | 2.29 | 0.277             | <b>0.008</b>              |
|                                                                     | blood-fed         | 32 | 1.56 | 0.28               | 1.57   | 1.37 | 1.77 | <b>0.049</b>      |                           |
| Maximum push-off force ( $F/mg_{\text{push-off, max}}$ ) [-]        | unfed             | 31 | 2.46 | 0.43               | 2.44   | 2.21 | 2.63 | 0.249             | <b>0.030</b>              |
|                                                                     | blood-fed         | 32 | 2.01 | 0.41               | 2.10   | 1.71 | 2.27 | 0.160             |                           |
|                                                                     | all               | 63 | 2.23 | 0.47               | 2.23   | 2.01 | 2.48 | -                 | -                         |
| Aerial flight speed ( $U_{\text{aerial}}$ ) [m s <sup>-1</sup> ]    | unfed             | 31 | 0.36 | 0.10               | 0.36   | 0.27 | 0.43 | 0.953             | 0.853                     |
|                                                                     | blood-fed         | 32 | 0.35 | 0.07               | 0.35   | 0.29 | 0.41 | 0.133             |                           |
| Aerial ascent angle ( $\gamma_{\text{aerial}}$ ) [-]                | unfed             | 31 | 26°  | 19°                | 31°    | 9°   | 40°  | 0.134             | <b>0.035</b>              |
|                                                                     | blood-fed         | 32 | 15°  | 19°                | 12°    | -3°  | 30°  | 0.064             |                           |
| Aerial body pitch ( $\beta_{\text{aerial}}$ ) [-]                   | unfed             | 31 | 23°  | 22°                | 27°    | 6°   | 40°  | <b>0.013</b>      | 0.219                     |
|                                                                     | blood-fed         | 32 | 30°  | 16°                | 32°    | 22°  | 44°  | <b>0.040</b>      |                           |
| Aerial force ( $F/mg_{\text{aerial}}$ ) [-]                         | unfed             | 31 | 1.05 | 0.13               | 1.03   | 0.98 | 1.10 | <b>0.033</b>      | 0.251                     |
|                                                                     | blood-fed         | 32 | 1.07 | 0.10               | 1.08   | 1.00 | 1.13 | 0.136             |                           |

**Table S3.** The effect of blood-feeding on wingbeat kinematics during the aerial phase of the take-off.

| parameter                                      | feeding condition | n  | mean | standard deviation | median | Q1   | Q3   | normality <i>p</i> -value | feeding condition <i>p</i> -value |
|------------------------------------------------|-------------------|----|------|--------------------|--------|------|------|---------------------------|-----------------------------------|
| Wingbeat frequency ( <i>f</i> ) [Hz]           | unfed             | 29 | 579  | 38                 | 584    | 555  | 603  | 0.505                     | 0.534                             |
|                                                | blood-fed         | 29 | 573  | 37                 | 582    | 543  | 594  | 0.635                     |                                   |
| Stroke amplitude ( $A_{\text{stroke}}$ ) [-]   | unfed             | 29 | 42°  | 5°                 | 42°    | 39°  | 46°  | 0.473                     | <0.001                            |
|                                                | blood-fed         | 29 | 54°  | 6°                 | 56°    | 50°  | 59°  | 0.268                     |                                   |
| Pitch amplitude ( $A_{\text{pitch}}$ ) [-]     | unfed             | 29 | 121° | 10°                | 122°   | 114° | 129° | 0.692                     | <0.001                            |
|                                                | blood-fed         | 29 | 134° | 12°                | 135°   | 124° | 139° | 0.614                     |                                   |
| Stroke-plane pitch adjustment ( $\sigma$ ) [-] | unfed             | 29 | -1°  | 4°                 | -1°    | -4°  | 1°   | 0.221                     | <0.001                            |
|                                                | blood-fed         | 29 | -9°  | 4°                 | -9°    | -12° | -5°  | 0.130                     |                                   |

**Table S4.** The relative contribution of leg-derived push-off forces and wing-derived aerodynamic forces to total force production during the push-off phase and aerial phase of the take-off.

| parameter                                            | feeding condition | n  | mean | standard deviation | median | Q1   | Q3   | normality <i>p</i> -value | feeding condition <i>p</i> -value |
|------------------------------------------------------|-------------------|----|------|--------------------|--------|------|------|---------------------------|-----------------------------------|
| Push-off force ( $F/mg_{\text{push-off}}$ ) [-]      | total force       | 16 | 2.04 | 0.41               | 1.92   | 1.75 | 2.36 | 0.236                     | <0.001                            |
|                                                      | aerodynamic       | 16 | 1.13 | 0.42               | 0.98   | 0.83 | 1.39 | 0.066                     |                                   |
| Aerial force ( $F/mg_{\text{aerial}}$ ) [-]          | total force       | 16 | 1.18 | 0.19               | 1.17   | 1.00 | 1.39 | 0.093                     | 0.136                             |
|                                                      | aerodynamic       | 16 | 1.14 | 0.41               | 1.05   | 0.87 | 1.18 | <0.001                    |                                   |
| Force ratio ( $F_{\text{aero}}/F_{\text{leg}}$ ) [-] | unfed             | 8  | 2.13 | 1.64               | 1.70   | 1.00 | 3.00 | 0.086                     | 0.105                             |
|                                                      | blood-fed         | 8  | 0.96 | 0.24               | 0.91   | 0.76 | 1.20 | 0.269                     |                                   |
|                                                      | all               | 16 | 1.55 | 1.29               | 1.20   | 0.76 | 1.71 | -                         |                                   |

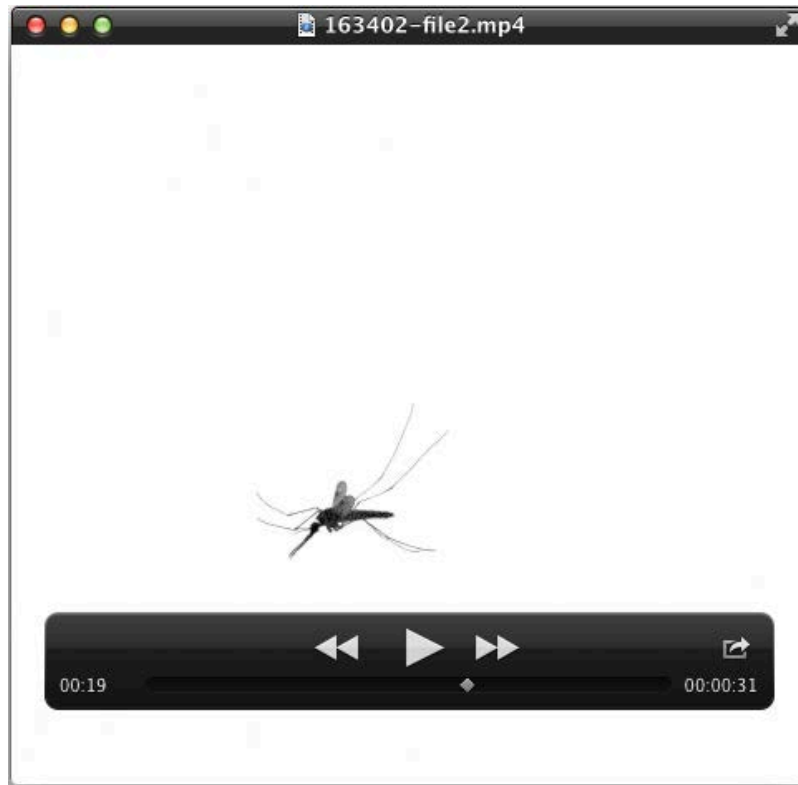

**Movie 1.** High-speed video of the take-off of an unfed mosquito filmed from the side. The video was recorded at 13,500 frames per second, and play-back was slowed down 450 times. The video corresponds to the photo-montage of Fig. 2A.

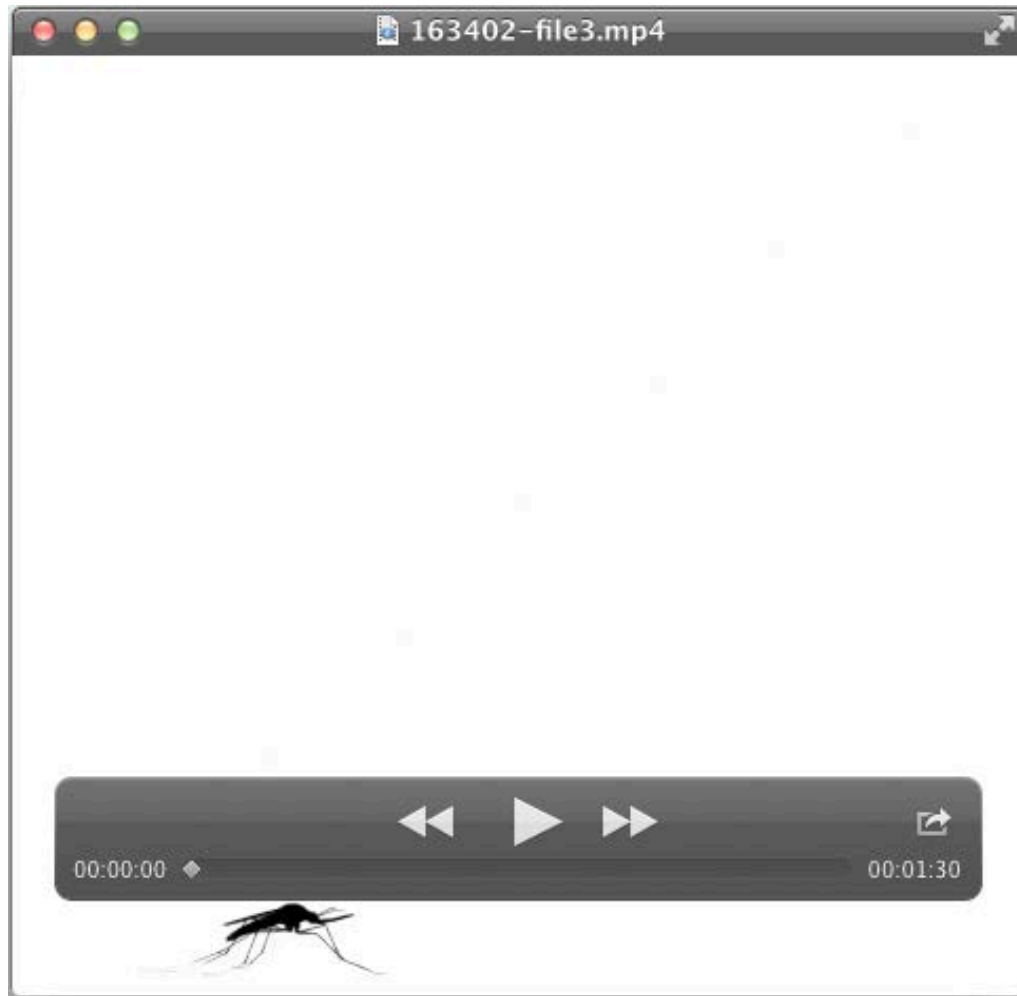

**Movie 2.** High-speed video of the take-off of an unfed mosquito filmed from the side. The video was recorded at 13,500 frames per second, and play-back was slowed down 450 times. The video corresponds to the photo-montage of Fig. 2B.

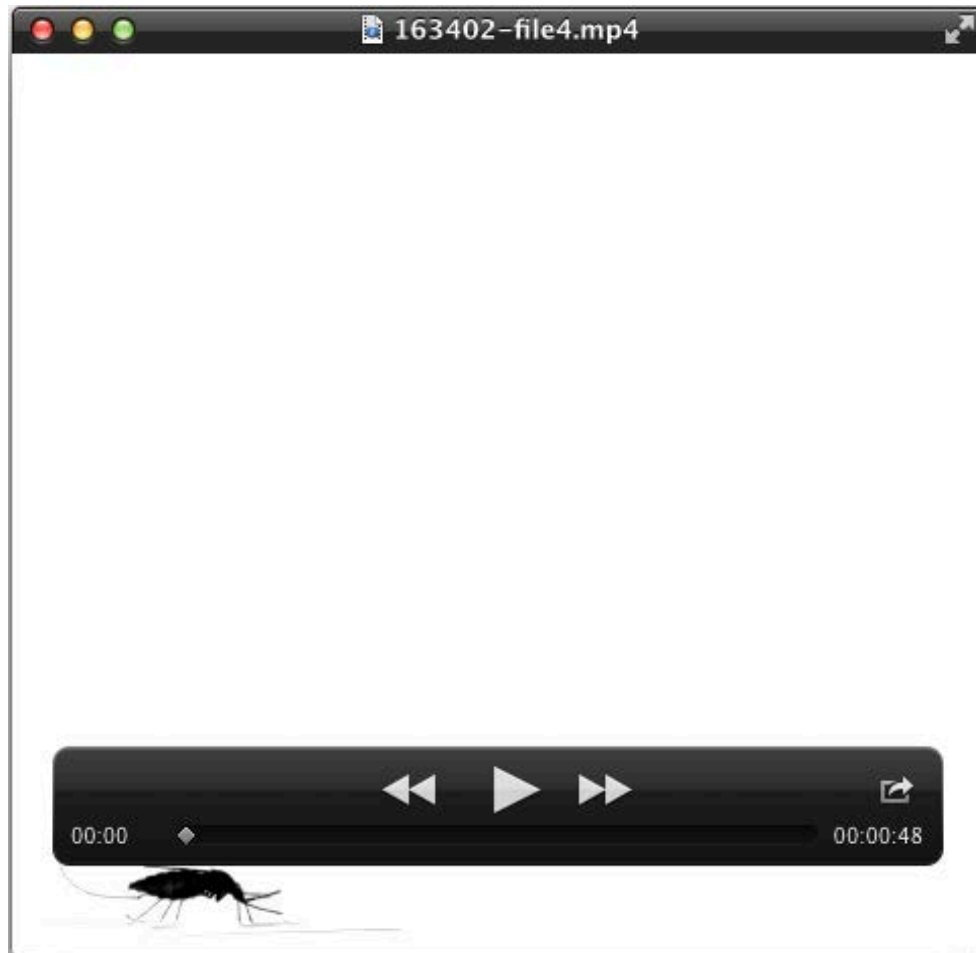

**Movie 3.** High-speed video of the take-off of a blood-fed mosquito filmed from the side. The video was recorded at 13,500 frames per second, and play-back was slowed down 450 times. The video corresponds to the photo-montage of Fig. 2C.

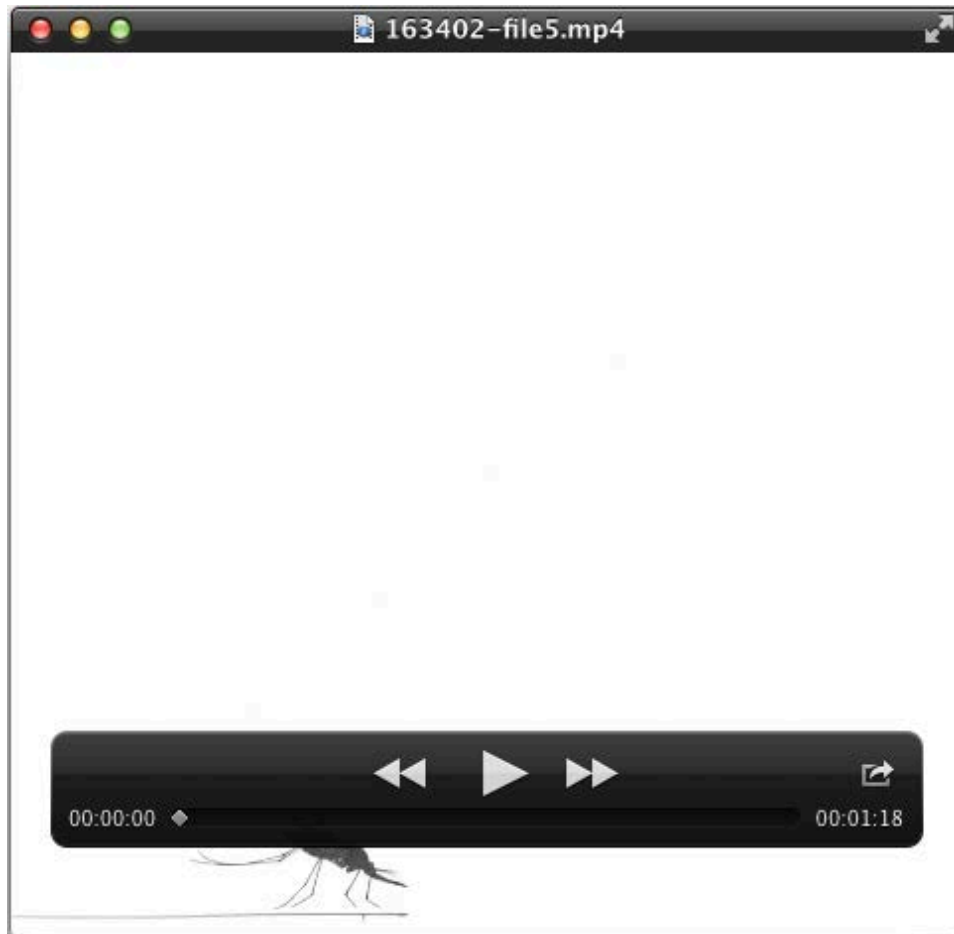

**Movie 4.** High-speed video of the take-off of a blood-fed mosquito filmed from the side. The video was recorded at 13,500 frames per second, and play-back was slowed down 450 times. The video corresponds to the photo-montage of Fig. 2D.



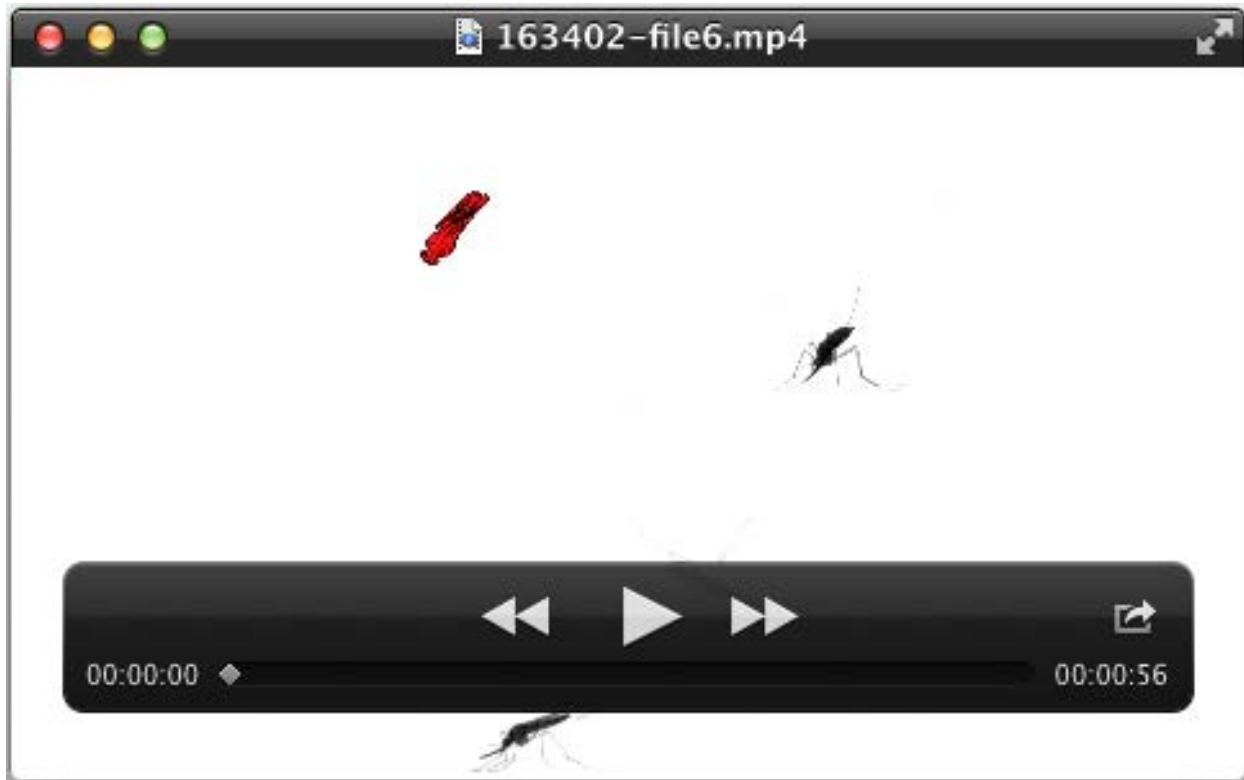

**Movie 5.** High-speed video and 3D model reconstruction from video tracking for the unfed mosquito of Fig. 5A-D. The movie consists of the front view video (top right), side view video (bottom left), top view video (bottom right), and the 3D model reconstruction (top left). The mosquito model consists of a rigid body and two rigid wings. The videos were recorded at 13,500 frames per second, and play-back was slowed down 450 times.

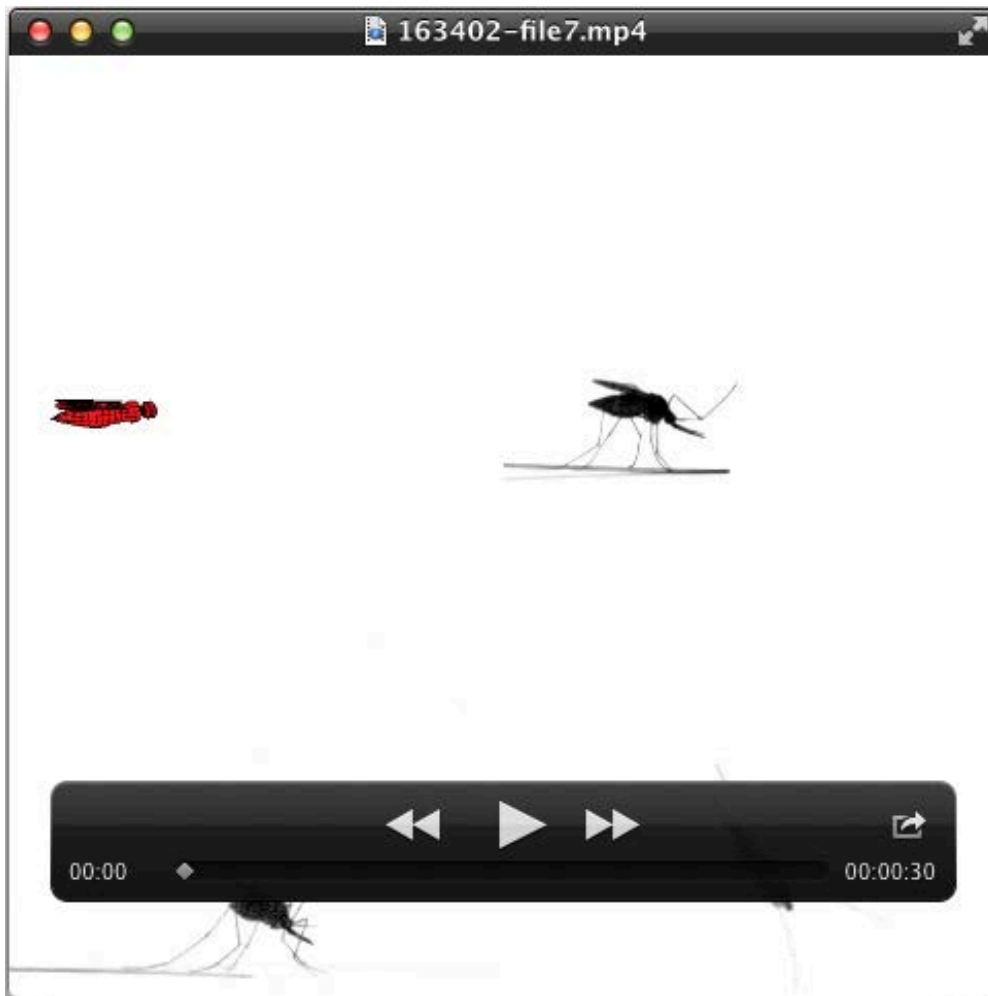

**Movie 6.** High-speed video and 3D model reconstruction from video tracking for the blood-fed mosquito of Fig. 5F-I. The movie consists of the two perpendicular side view videos (top right and bottom left), top view video (bottom right), and the 3D model reconstruction (top left). The mosquito model consists of a rigid body and two rigid wings. The videos were recorded at 13,500 frames per second, and play-back was slowed down 450 times.

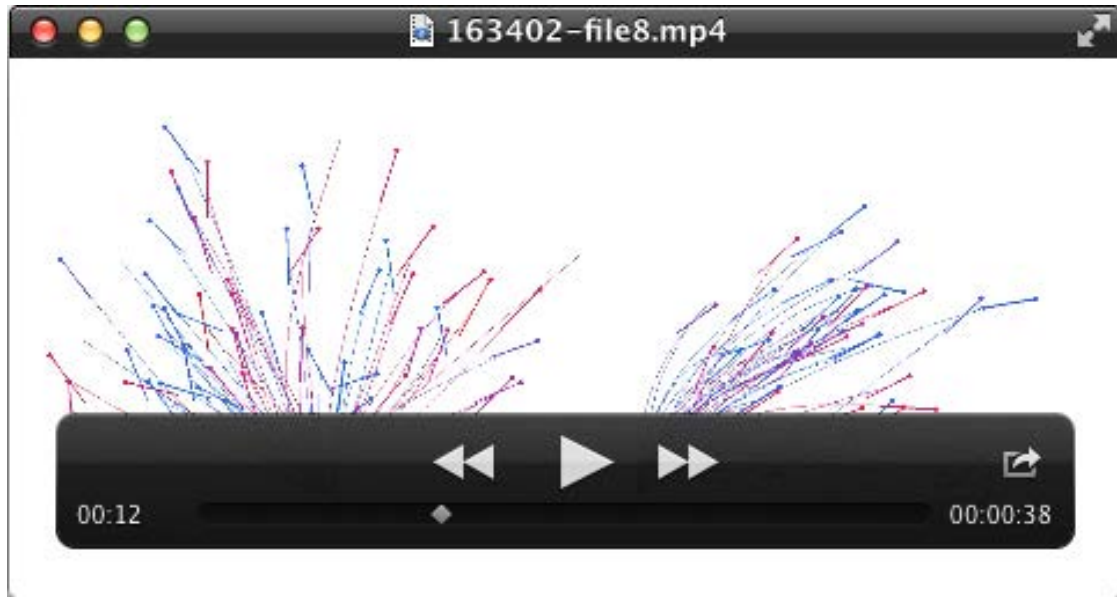

**Movie 7.** Top view (left) and side view (right) of the take-off dynamics of all experimental mosquitoes, corresponding to Fig. 3A,B. The trajectories were overlaid such that all lift-offs occurred at the same time. Thin lines show flight trajectories, and lollypops show the orientation of the longitudinal body axis, whereby the circles indicate head position, and stick length represents body length. The take-off dynamics is slowed down 100 times. Trajectories are color-coded with body weight according to the color-bar in Fig. 3B.

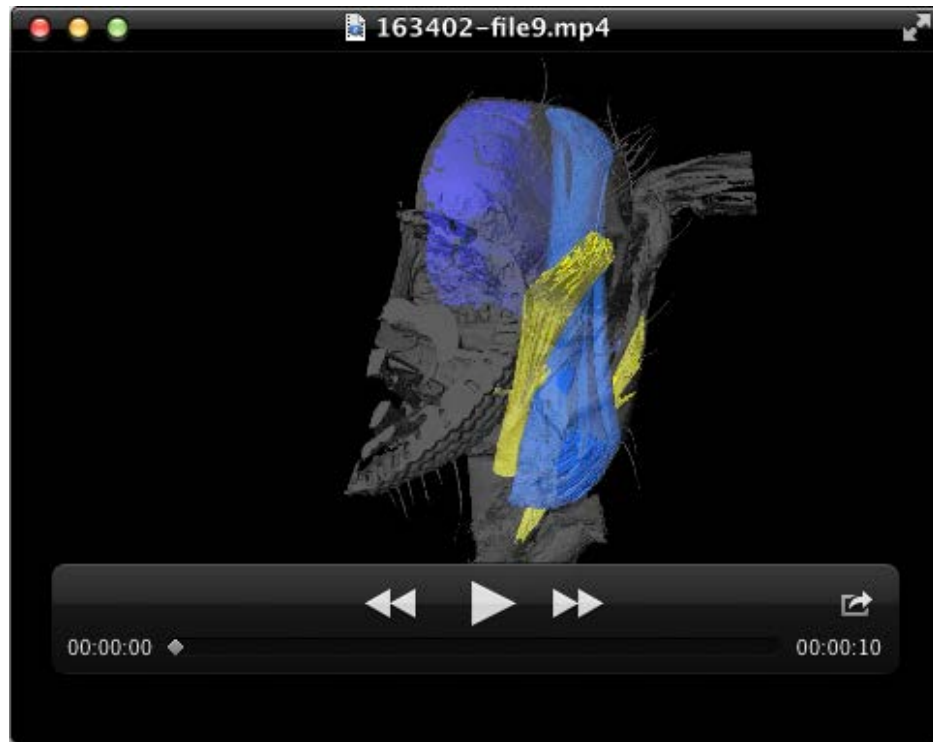

**Movie 8.** Three-dimensional  $\mu$ CT reconstruction of the muscular system within the left half of the thorax of a female malaria mosquito, as also shown in Fig. 6. The indirect flight power muscles consist of the dorso-ventral muscles (in light blue) and the dorso-longitudinal muscles (in dark blue). The leg muscles that mostly power push-off are the extracoxal depressor muscles of the trochanter of the front, middle and hind leg (in yellow). Surrounding material that was stained but did not belong to the segmented muscles was visualized in transparent grey.
